# Supplementary material for: Characterization of the Effects of a Novel Probiotic on Salmonella Colonization of a Piglet-Derived Intestinal Microbiota Using Improved Bioreactor
Source: MDPI journal article supplement (doi:10.3390/ani14050787), 2024-03-02
Supplement: s1 [file s1]

Supplementary Materials:

Supplementary Table S1: PCR primer's sequence

| Primers' name         | Primer's sequence                                  |
|-----------------------|----------------------------------------------------|
| 15FP1-CS1F (forward)  | 5'-ACACTGACGACATGGTTC-TACAGTGCCAGCMGCCGCGG-TAA-3'  |
| 806RP1-CS2R (reverse) | 5'-TACGGTAGCAGAGACTT-GGTCTGGAC-TACHVGGGTWTCTAAT-3' |

Supplementary Table S2: p values returned by the pairwise ADONIS test for Figure 2 comparison of each treatment at each timepoint.

| Conditions    | CTL 48h | Daily 48h | CTL 72h | Daily 72h | CTL 96h | Daily 96h | CTL 120h | Daily 120h |
|---------------|---------|-----------|---------|-----------|---------|-----------|----------|------------|
| Continue 48h  | p>0.05  | p>0.05    | X       | X         | X       | X         | X        | X          |
| Daily 48h     | p>0.05  | X         | X       | X         | X       | X         | X        | X          |
| Continue 72h  | X       | X         | 0.001   | 0.038     | X       | X         | X        | X          |
| Daily 72h     | X       | X         | 0.022   | X         | X       | X         | X        | X          |
| Continue 96h  | X       | X         | X       | X         | 0.001   | 0.002     | X        | X          |
| Daily 96h     | X       | X         | X       | X         | 0.042   | X         | X        | X          |
| Continue 120h | X       | X         | X       | X         | X       | X         | 0.001    | 0.008      |
| Daily 120h    | X       | X         | X       | X         | X       | X         | 0.032    | X          |

h:hours; x: no comparison made

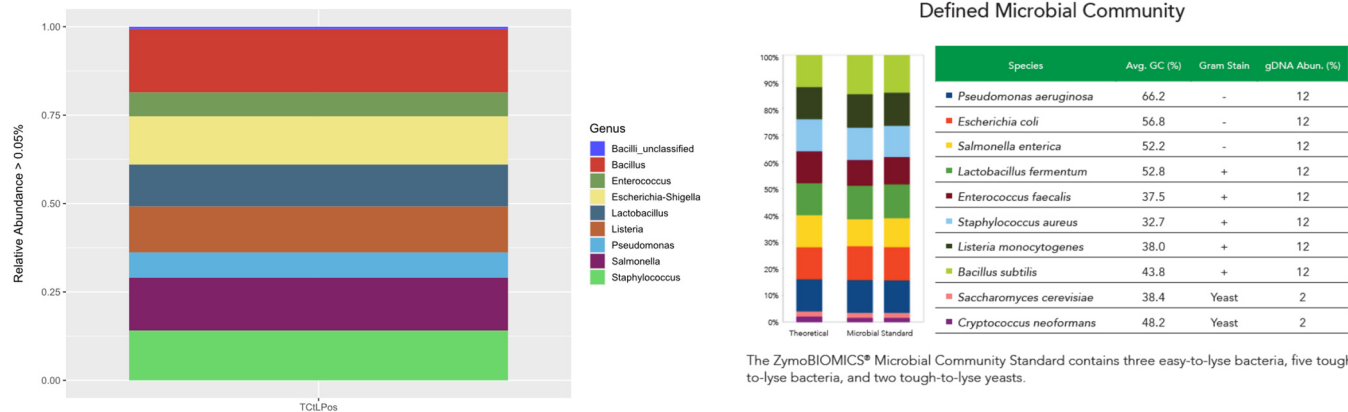

Supplementary Figure S1: Positive control composition according to manufacturer description.

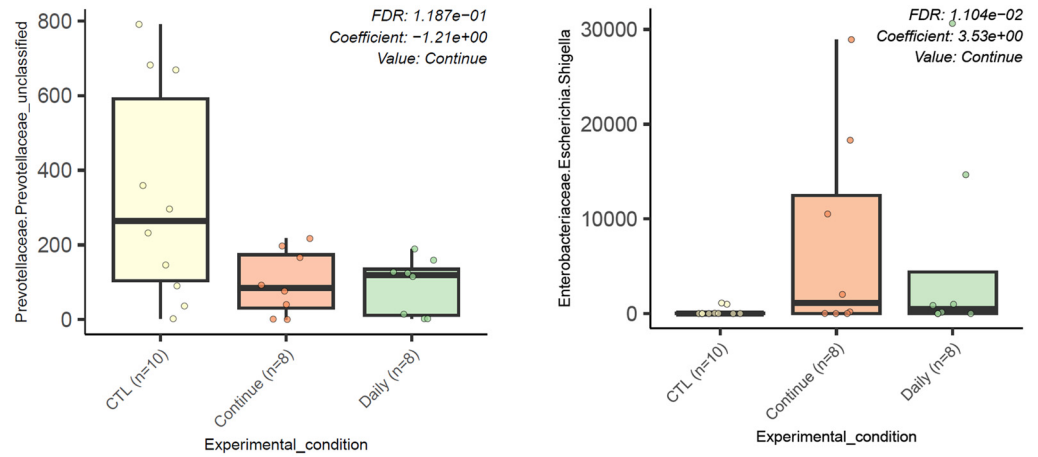

Supplementary Figure S2: Significant genera at T48 for both treatment in comparison with the control analyzed by MaAslin2

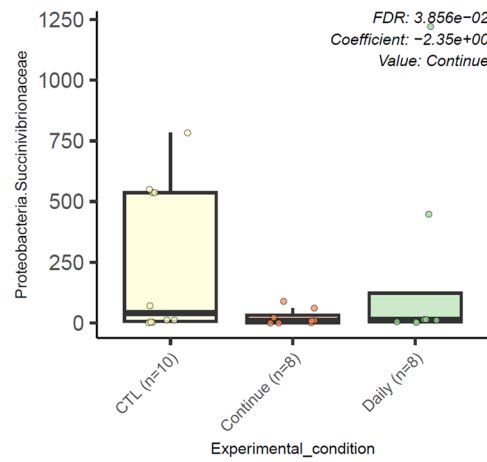

Supplementary Figure S3: Significant family T48 for both treatment in comparison with the control analyzed by MaAslin2

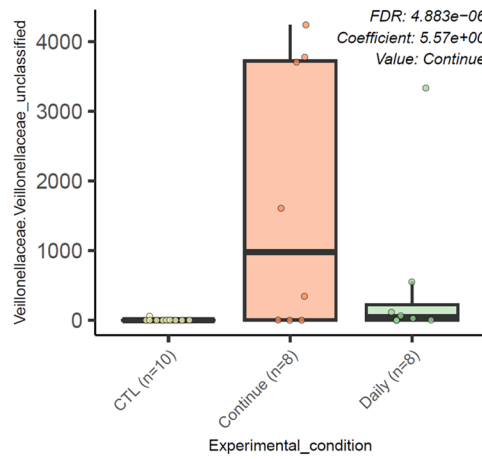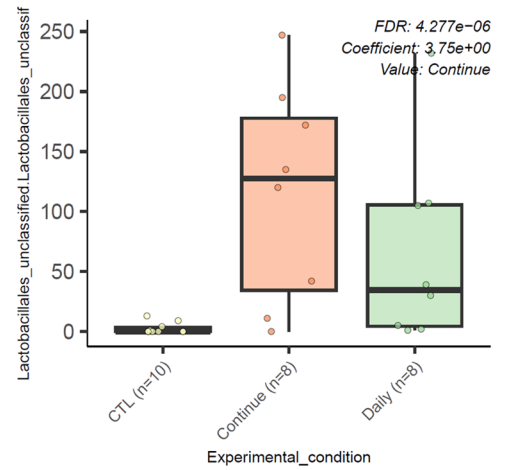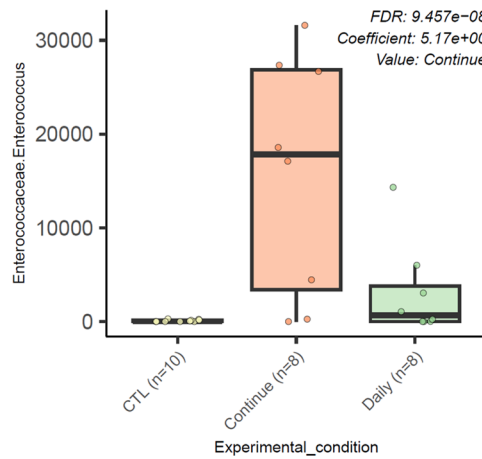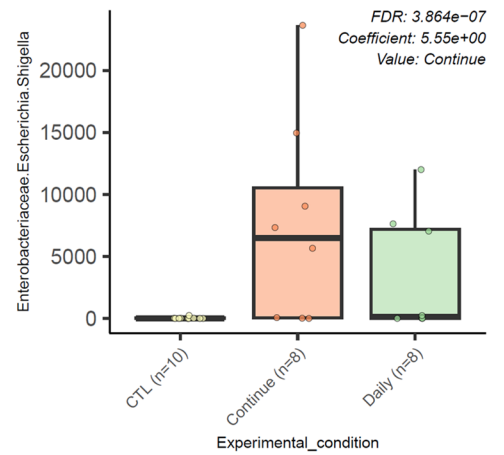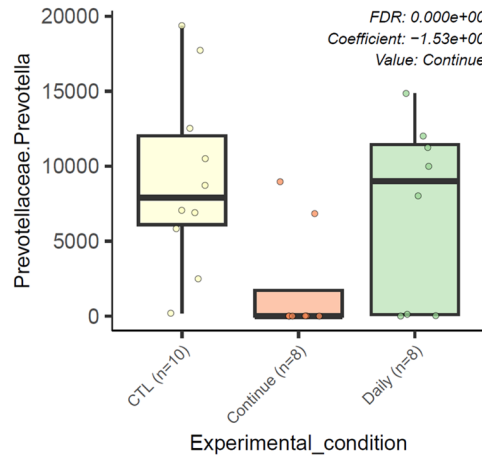

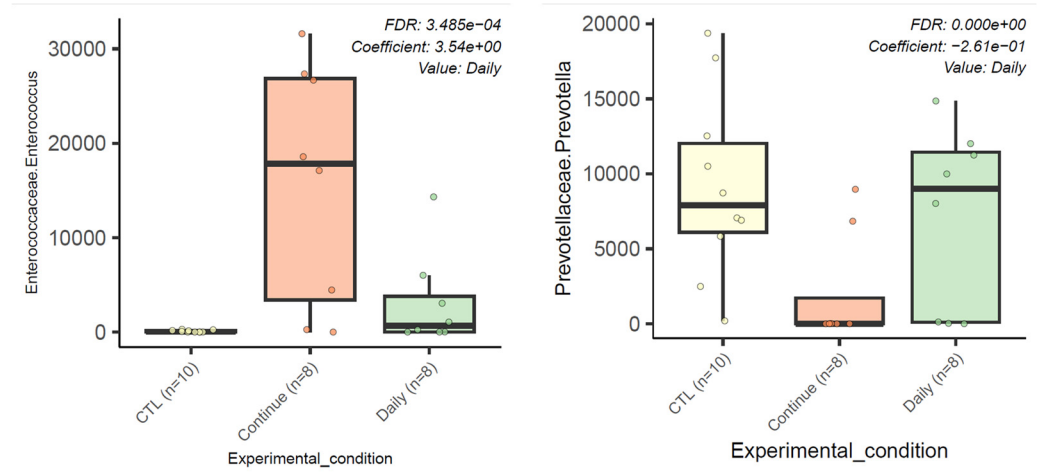

Supplementary Figure S4: Significant genera T72 for both treatment in comparison with the control analyzed by MaAslin2

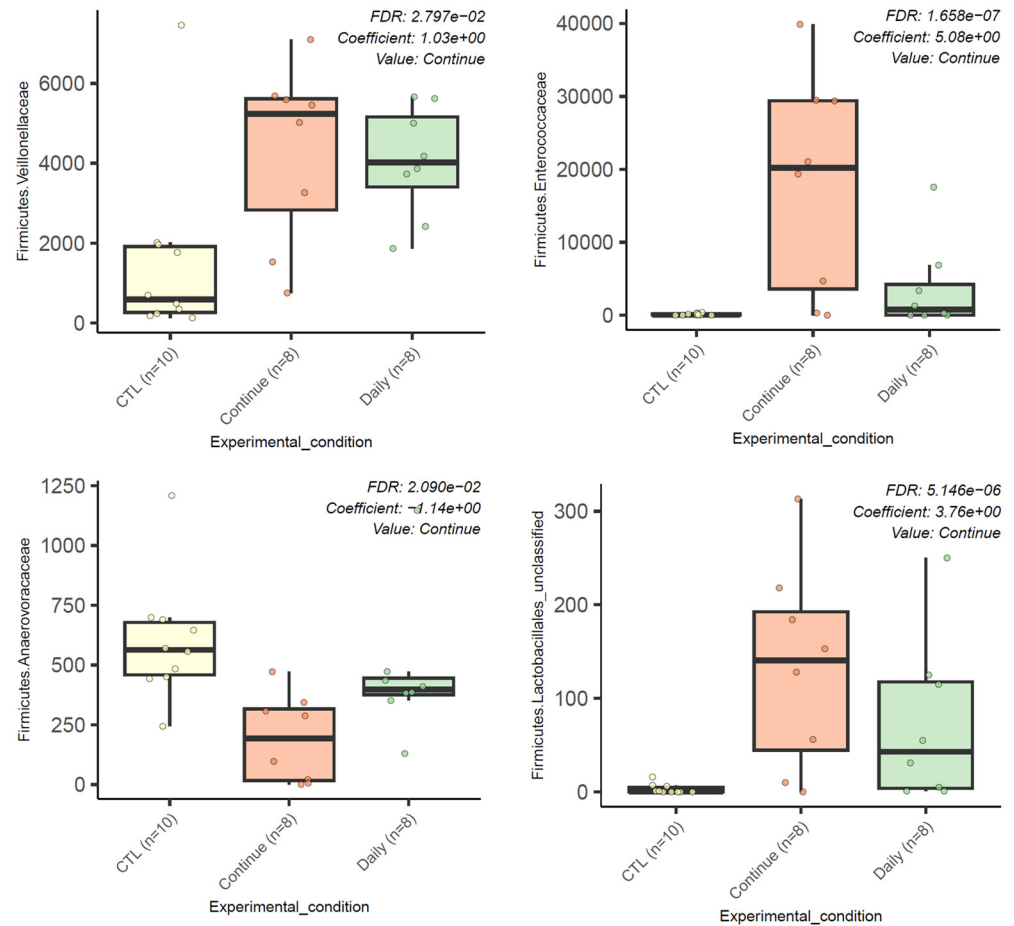

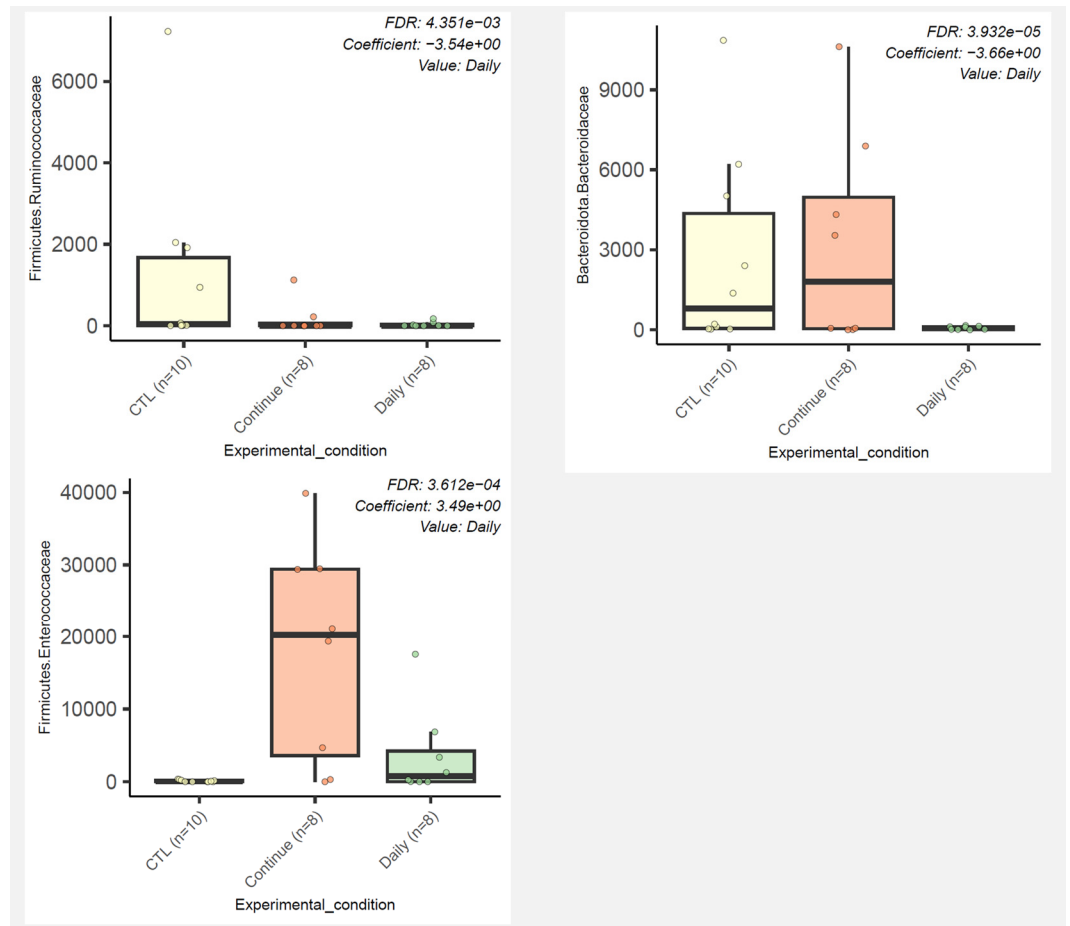

Supplementary Figure S5: Significant family T72 for both treatment in comparison with the control analyzed by MaAslin2

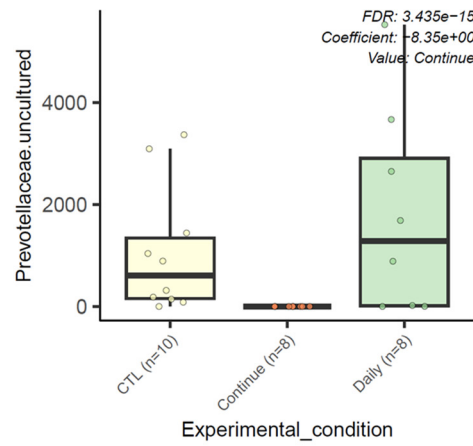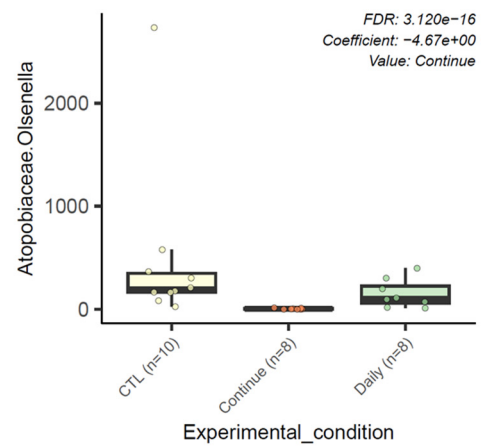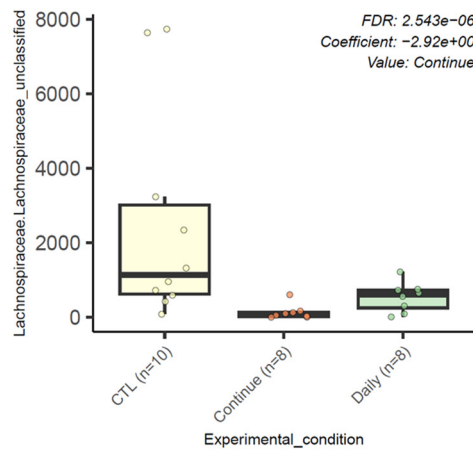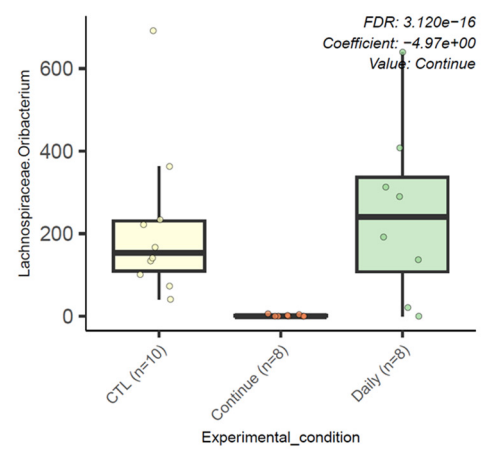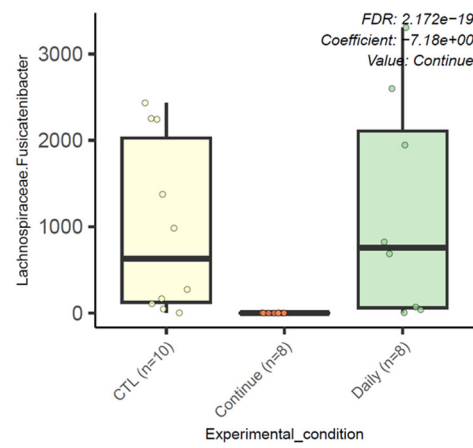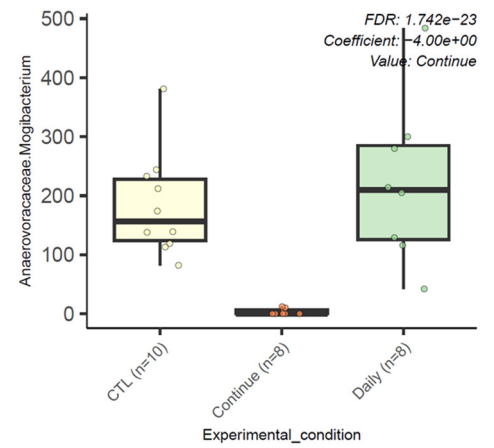

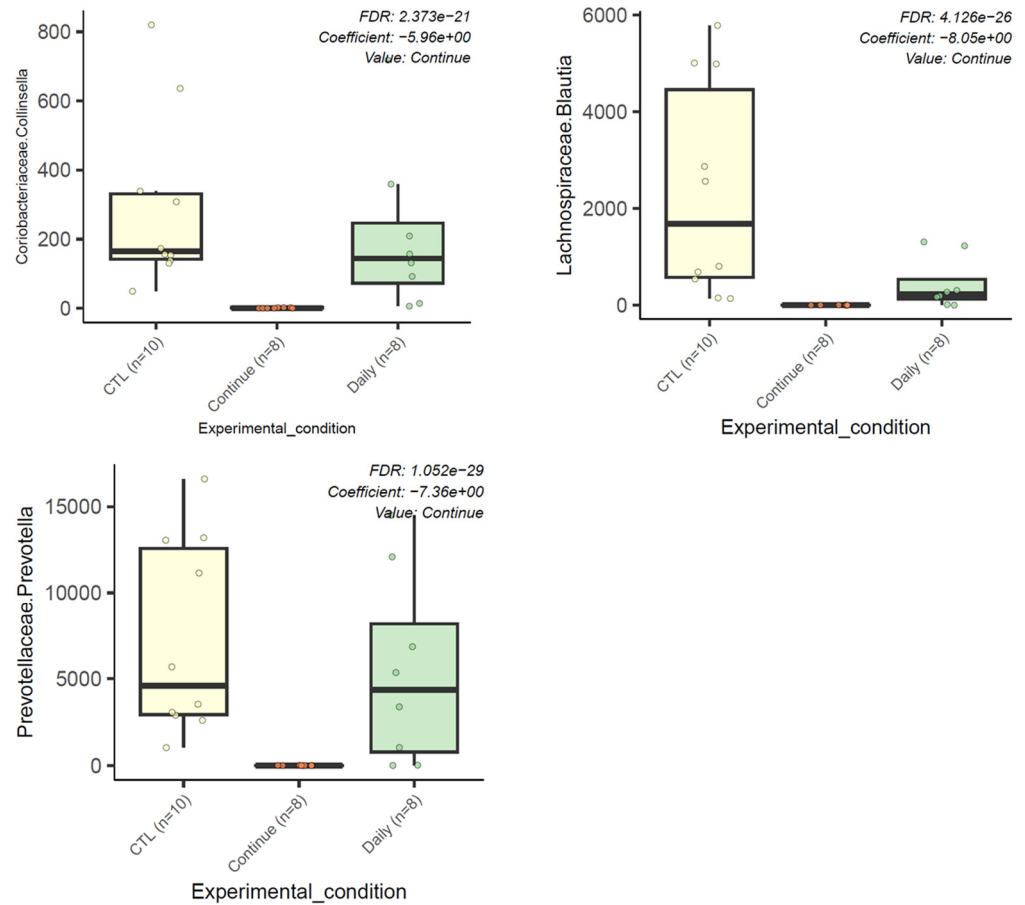

Supplementary Figure S6: Significant genera T96 for both treatment in comparison with the control analyzed by MaAslin2

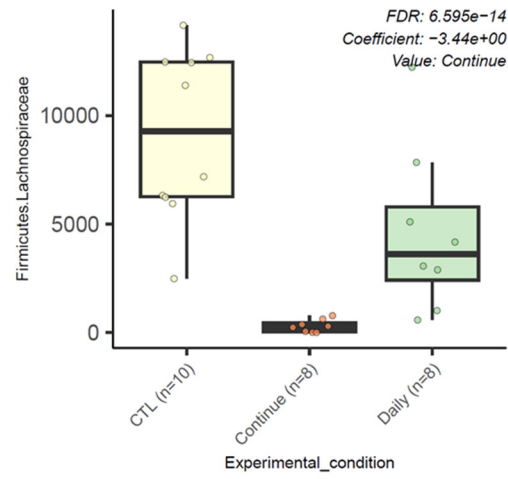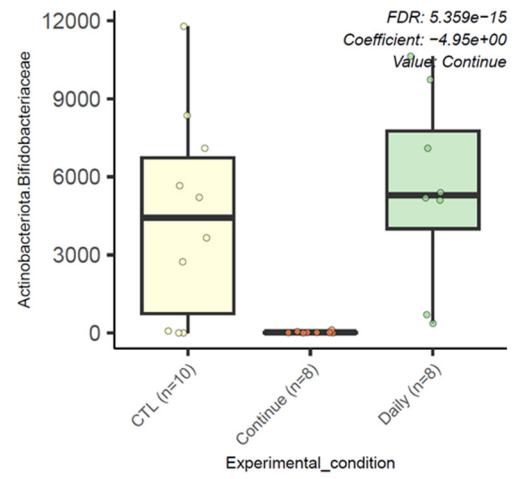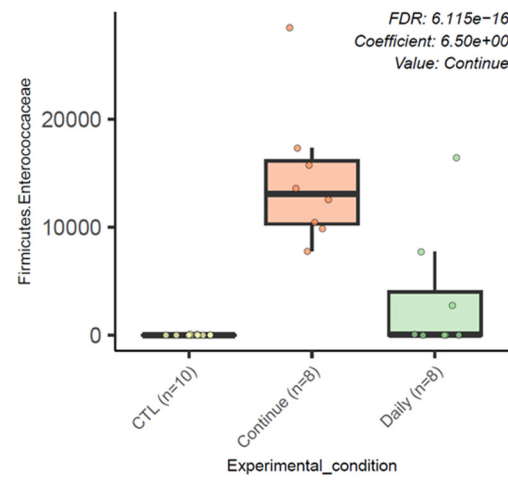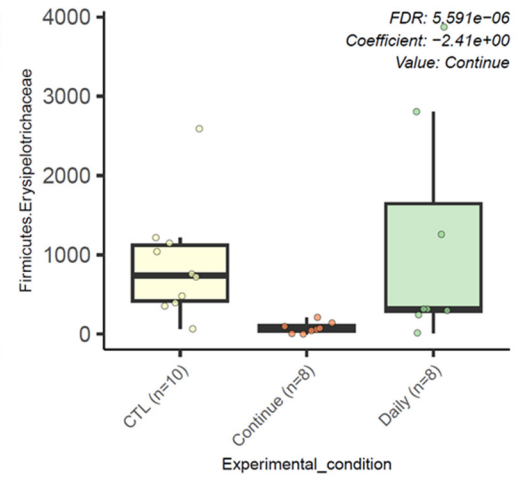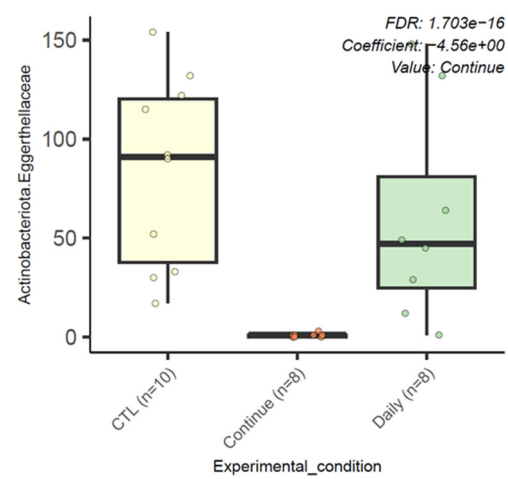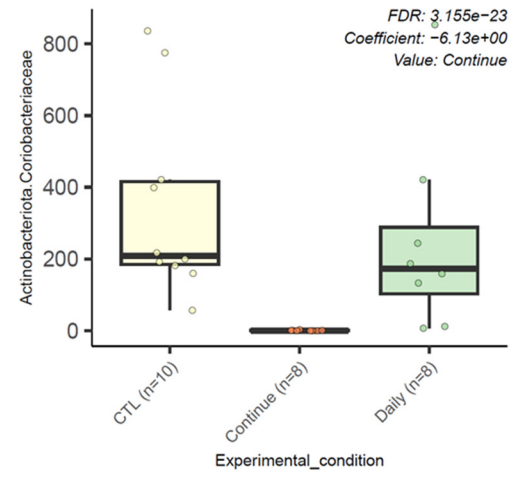



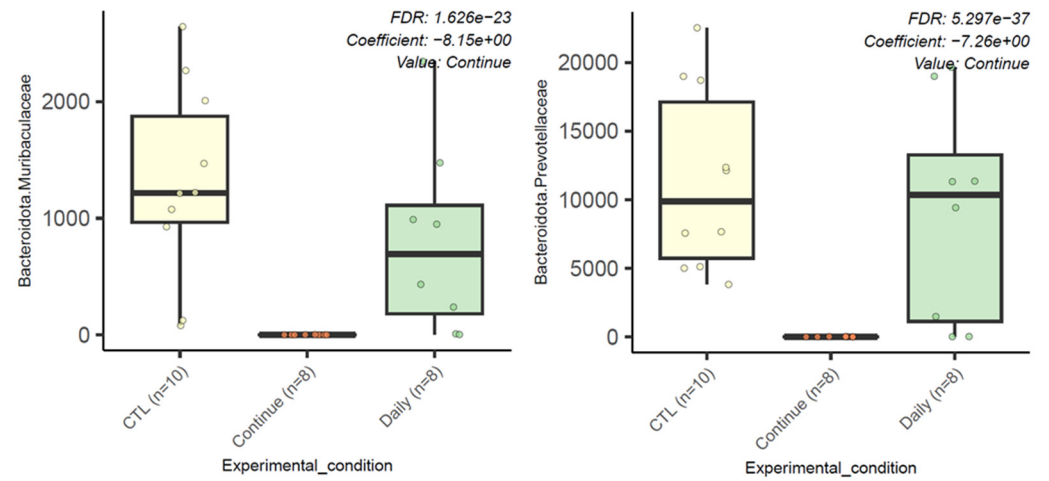

Supplementary Figure S7: Significant family T96 for both treatment in comparison with the control analyzed by MaAslin2

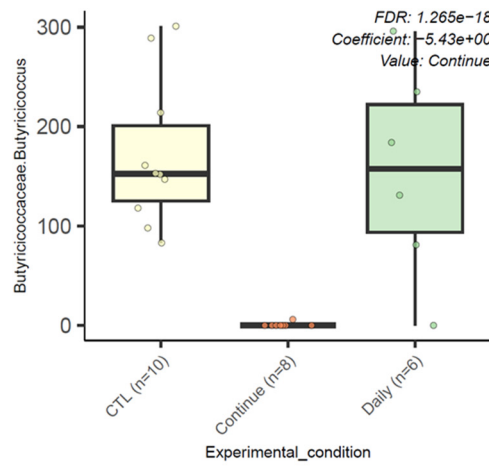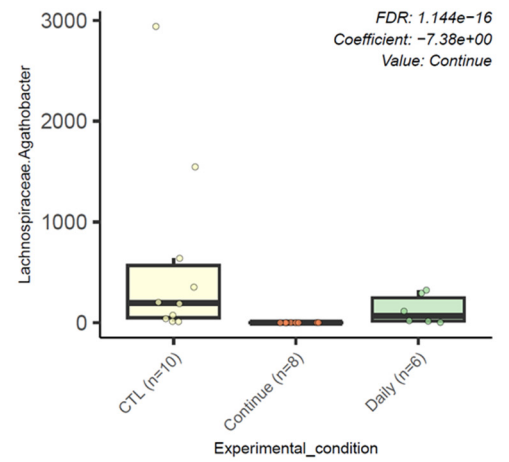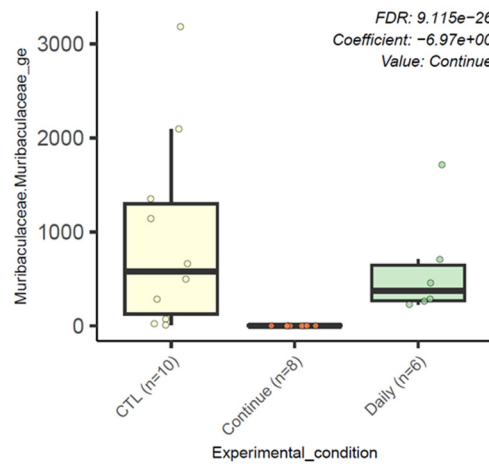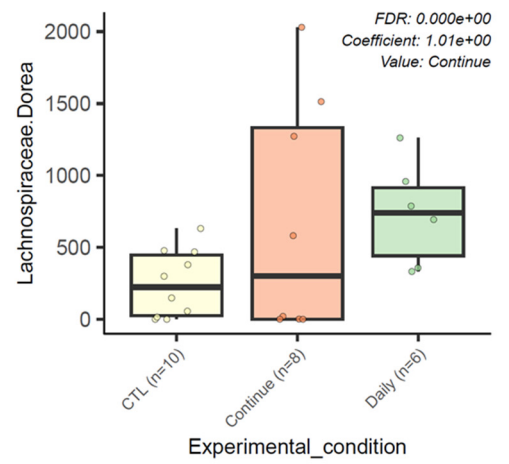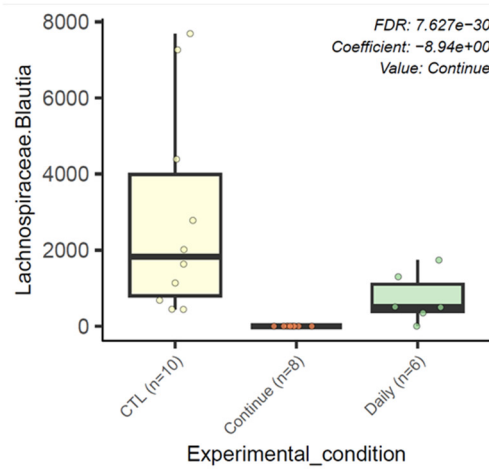

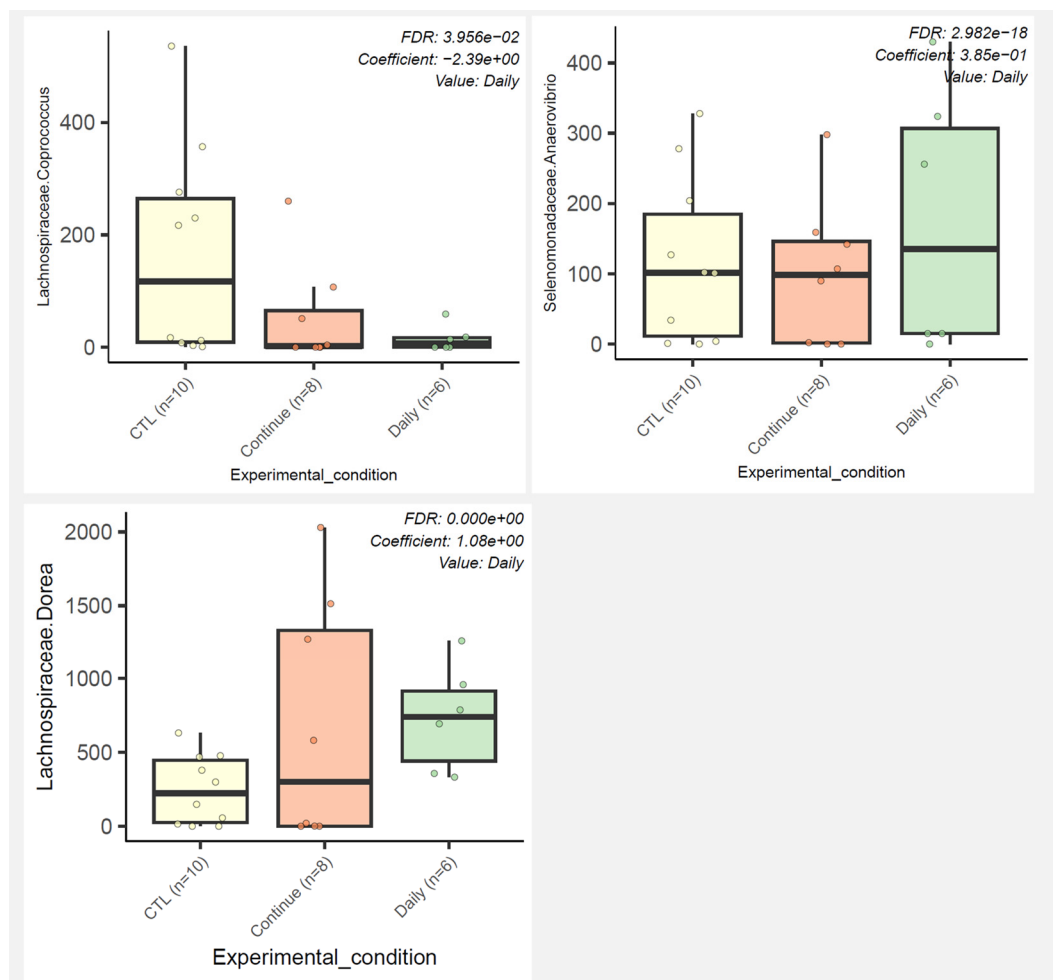

Supplementary Figure S8: Significant genera T120 for both treatment in comparison with the control analyzed by MaAslin2

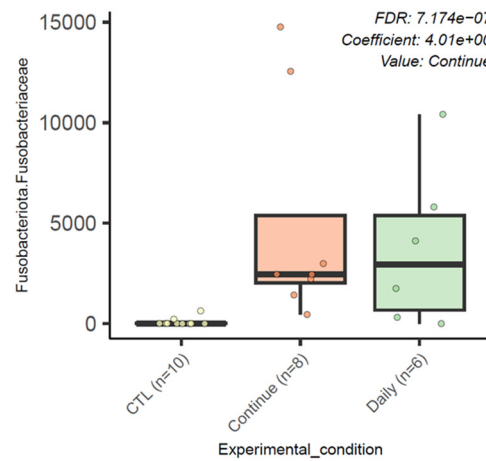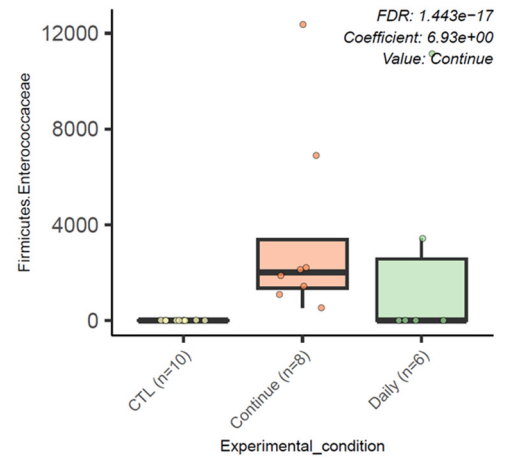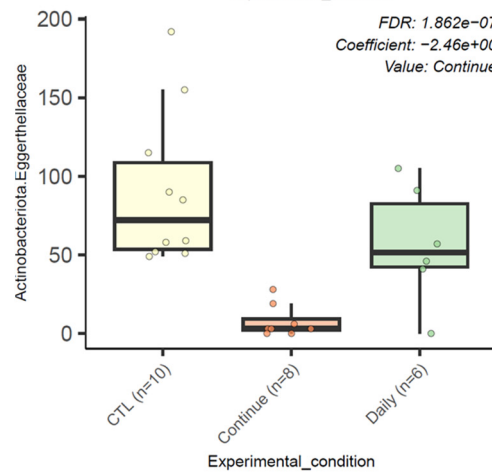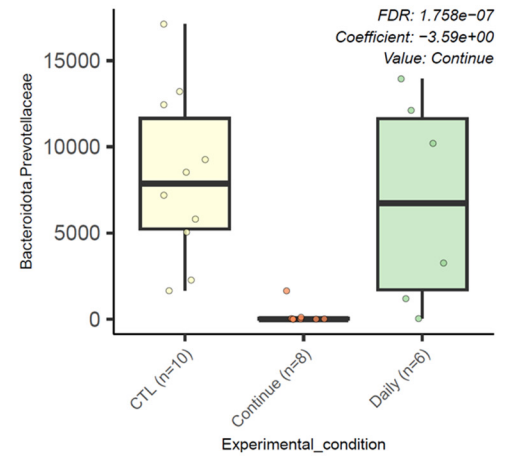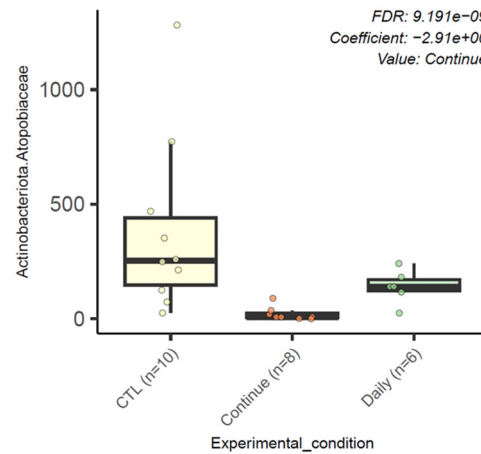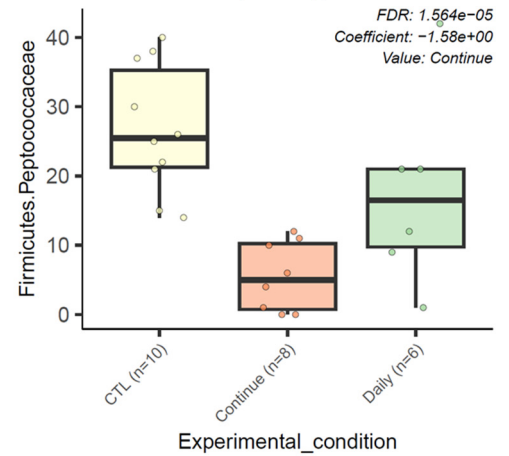

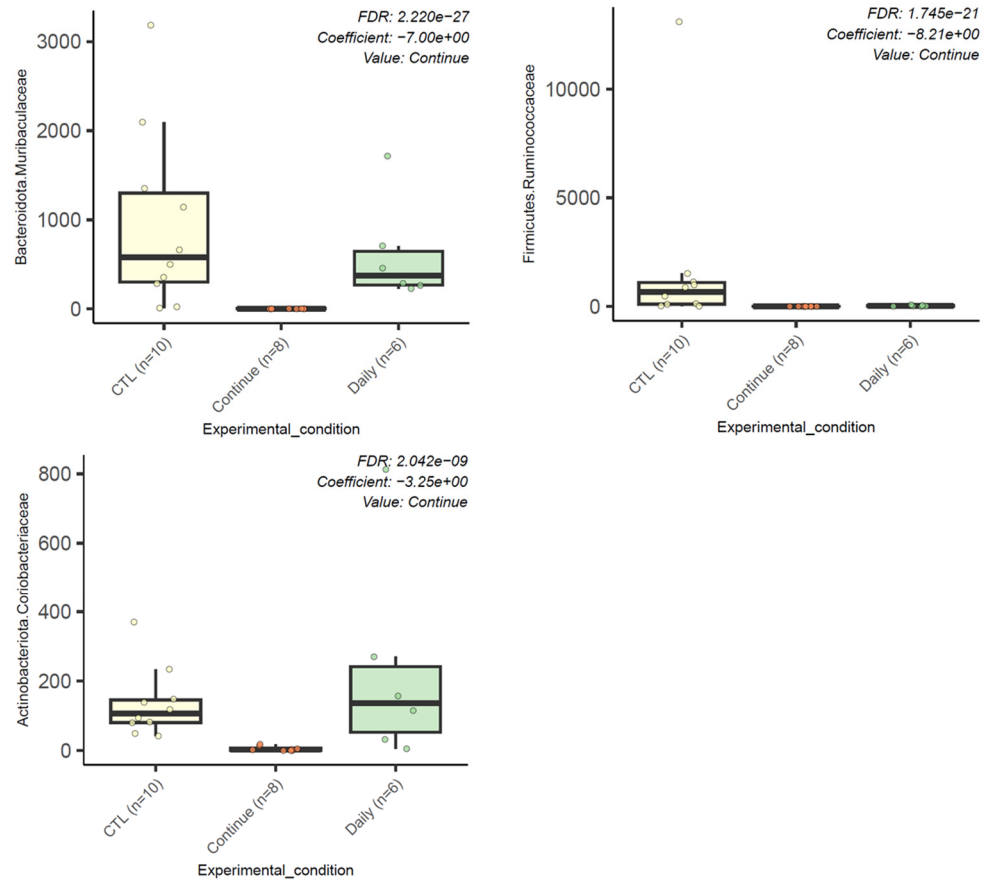

Supplementary Figure S9: Significant family T120 for both treatment in comparison with the control analyzed by MaAslin2

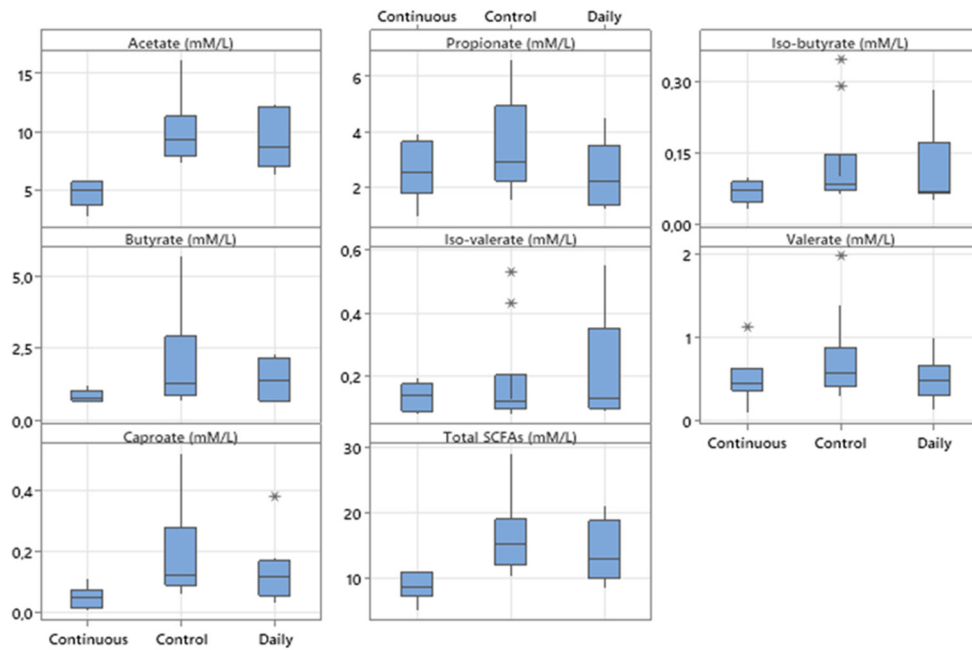

Supplementary Figure S10: SCFA analyzes in mM/mL

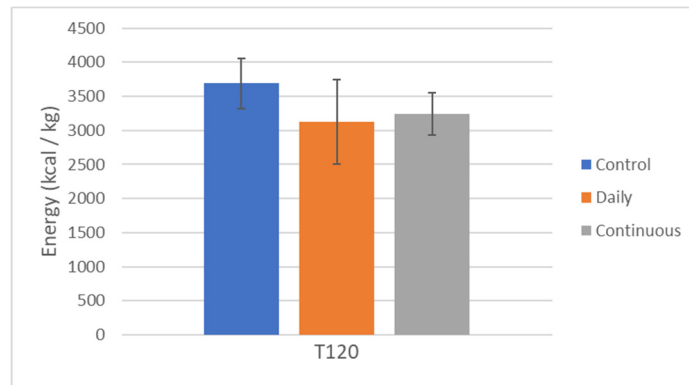

Supplementary Figure S11: Energy concentration in the sample at T120 in kcal/kg of bioreactor dry matter. The ANOVA test showed no significant result. ( $p = 0.14$ )

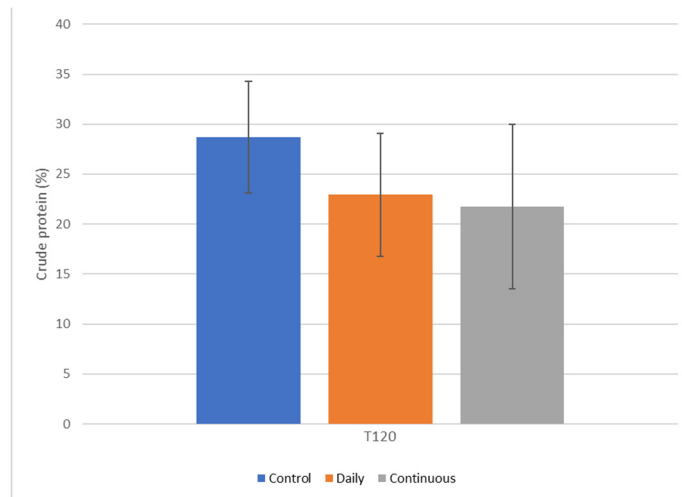

Supplementary Figure S12: Percentage of crude protein in the sample at T120. The ANOVA test showed no significant result. ( $p = 0.10$ )

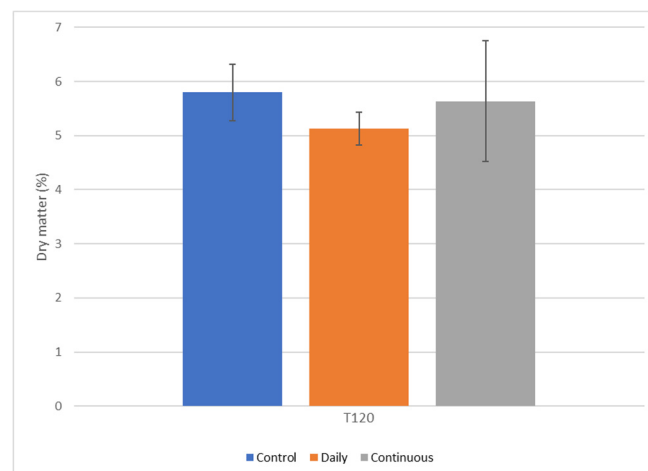

Supplementary Figure S13: Percentage of dry matter in the sample at T120. The ANOVA test showed no significant result. ( $p = 0.15$ )

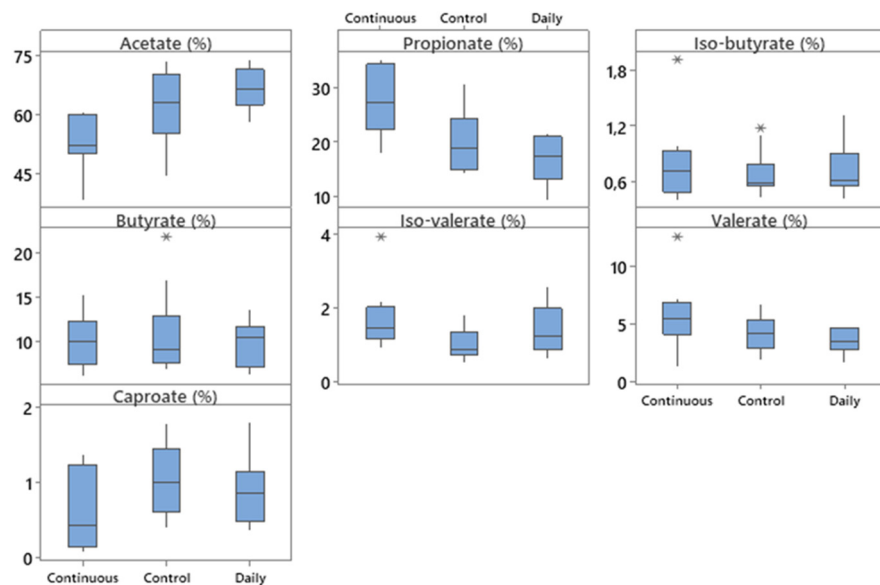

Supplementary Figure S14: SCFA analyzes in %

Supplementary Table S3: PCR reagent from Invitrogen SuperFi DNA polymerase kit

| Réactifs                        | Concentration finale |
|---------------------------------|----------------------|
| SuperFi Buffer [5x]             | 1x                   |
| Enhancer [5x]                   | 1x                   |
| dNTPs [10 mM]                   | 0.2 mM               |
| Forward primer [20 µM]          | 0.6 µM               |
| Reverse primer [20 µM]          | 0.6 µM               |
| BSA [20 mg/mL]                  | 0.4 mg/mL            |
| SuperFi TAQ polymerase [2 U/µL] | 0.02 U/µL            |
| H <sub>2</sub> O PCR            | N/A                  |

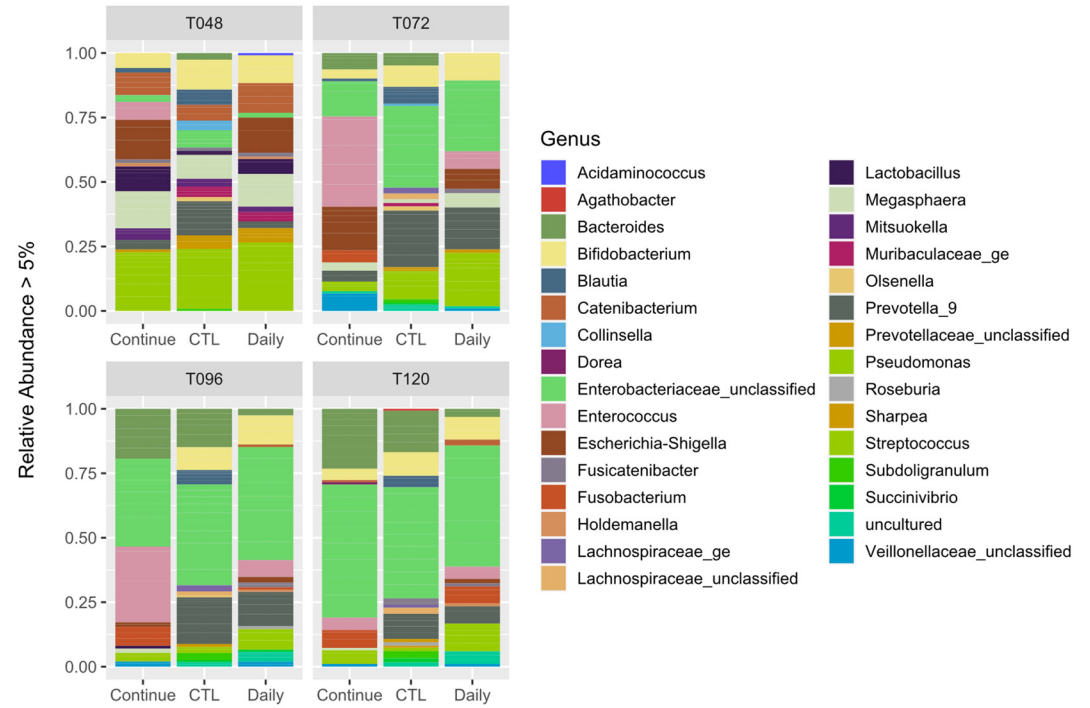

Supplementary Figure S15. Microbiota composition according to the time and probiotic use
